# Supplementary material for: Neutrophils promote tumor invasion via FAM3C-mediated epithelial-to-mesenchymal transition in gastric cancer
Source: Int J Biol Sci. 2023 Feb 21;19(5):1352–68. doi: 10.7150/ijbs.79022 (PMC10086748; doi:10.7150/ijbs.79022)
Supplement: Supplementary file 1 — Supplementary figures and tables. [file ijbsv19p1352s1.pdf]

Supplementary Materials

Wang's Figure S1

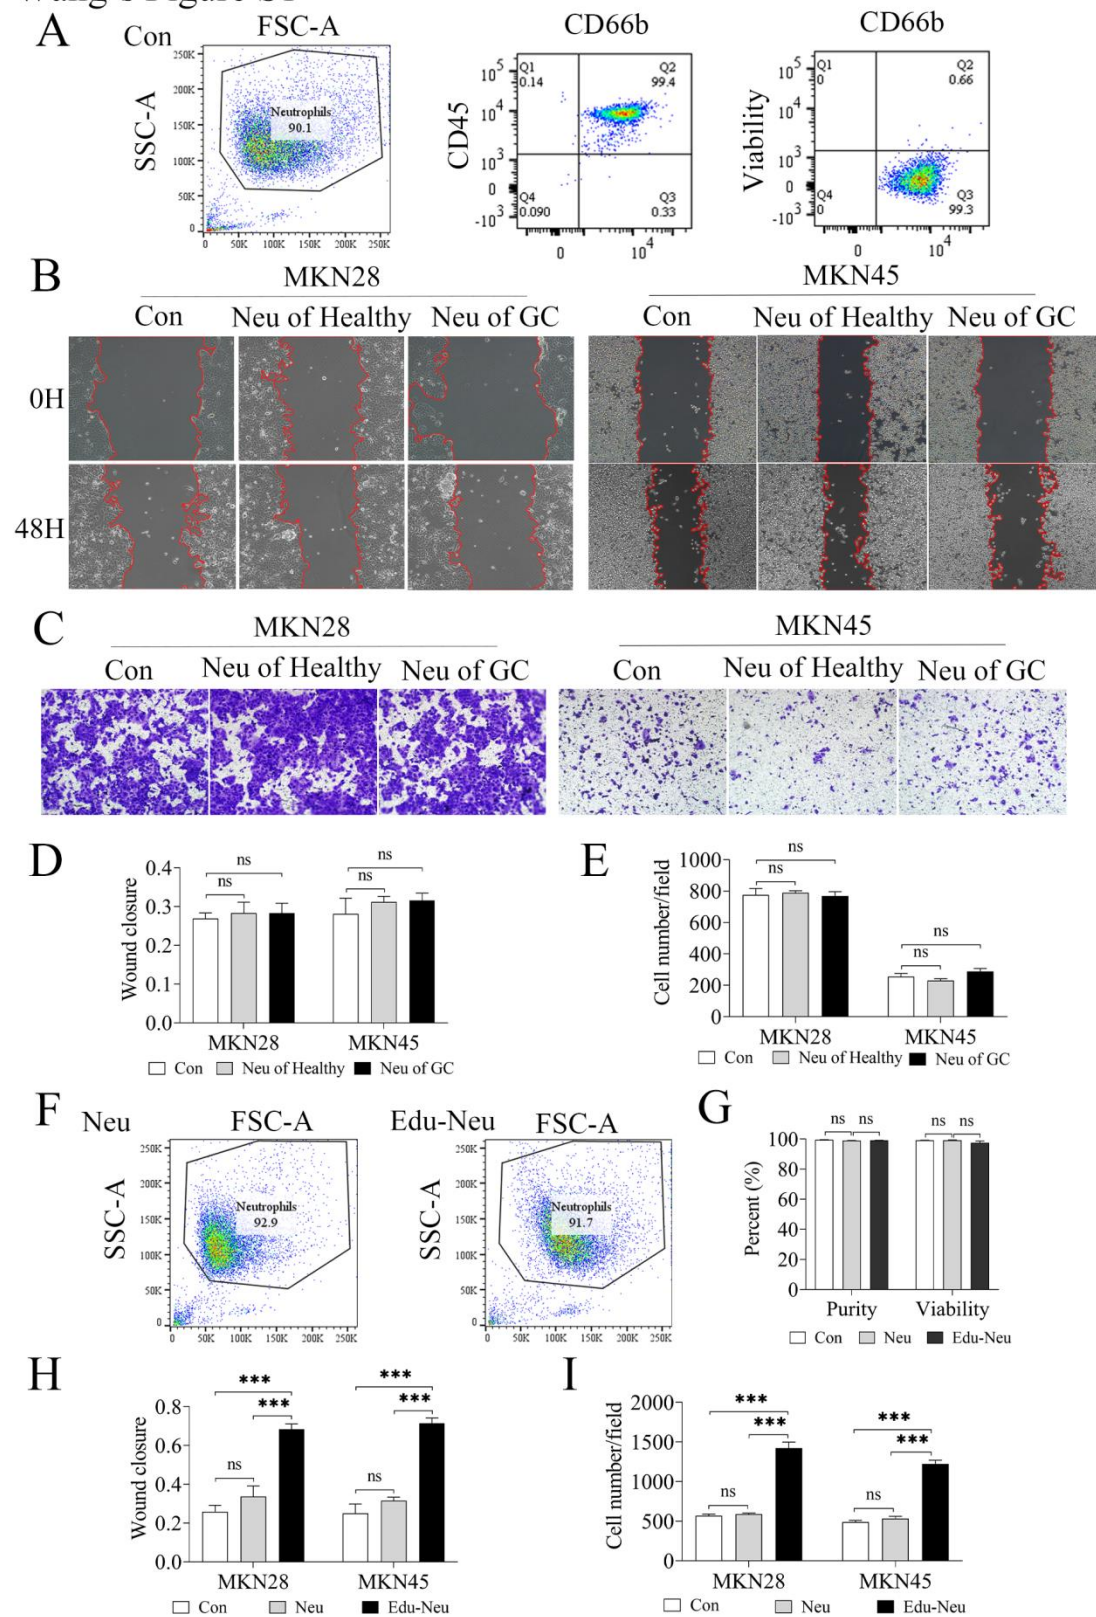

**Figure s1.** (A) FCM assays showed the isolated neutrophils had excellent purity and viability. (B,

**C, D, E**) CMs of isolated peripheral neutrophils from healthy donors (Neu of Healthy) and gastric cancer patients (Neu of GC) had no impact on MKN28 or MKN45 cells migration (**B, D**) and invasion (**C, E**) ( $\times 100$ ). (**F, G**) FCM analyses showed co-culture with tumor cells exerted no remarkable influence on purity and viability of neutrophils. (**H, I**) CMs of Edu-Neus promoted MKN28 or MKN45 cell migration (**H**) and invasion (**I**). (\*\*\*,  $P < 0.001$ ) (Neu, neutrophil; Edu-Neu, tumor-educated neutrophil)

# Wang's Figure S2

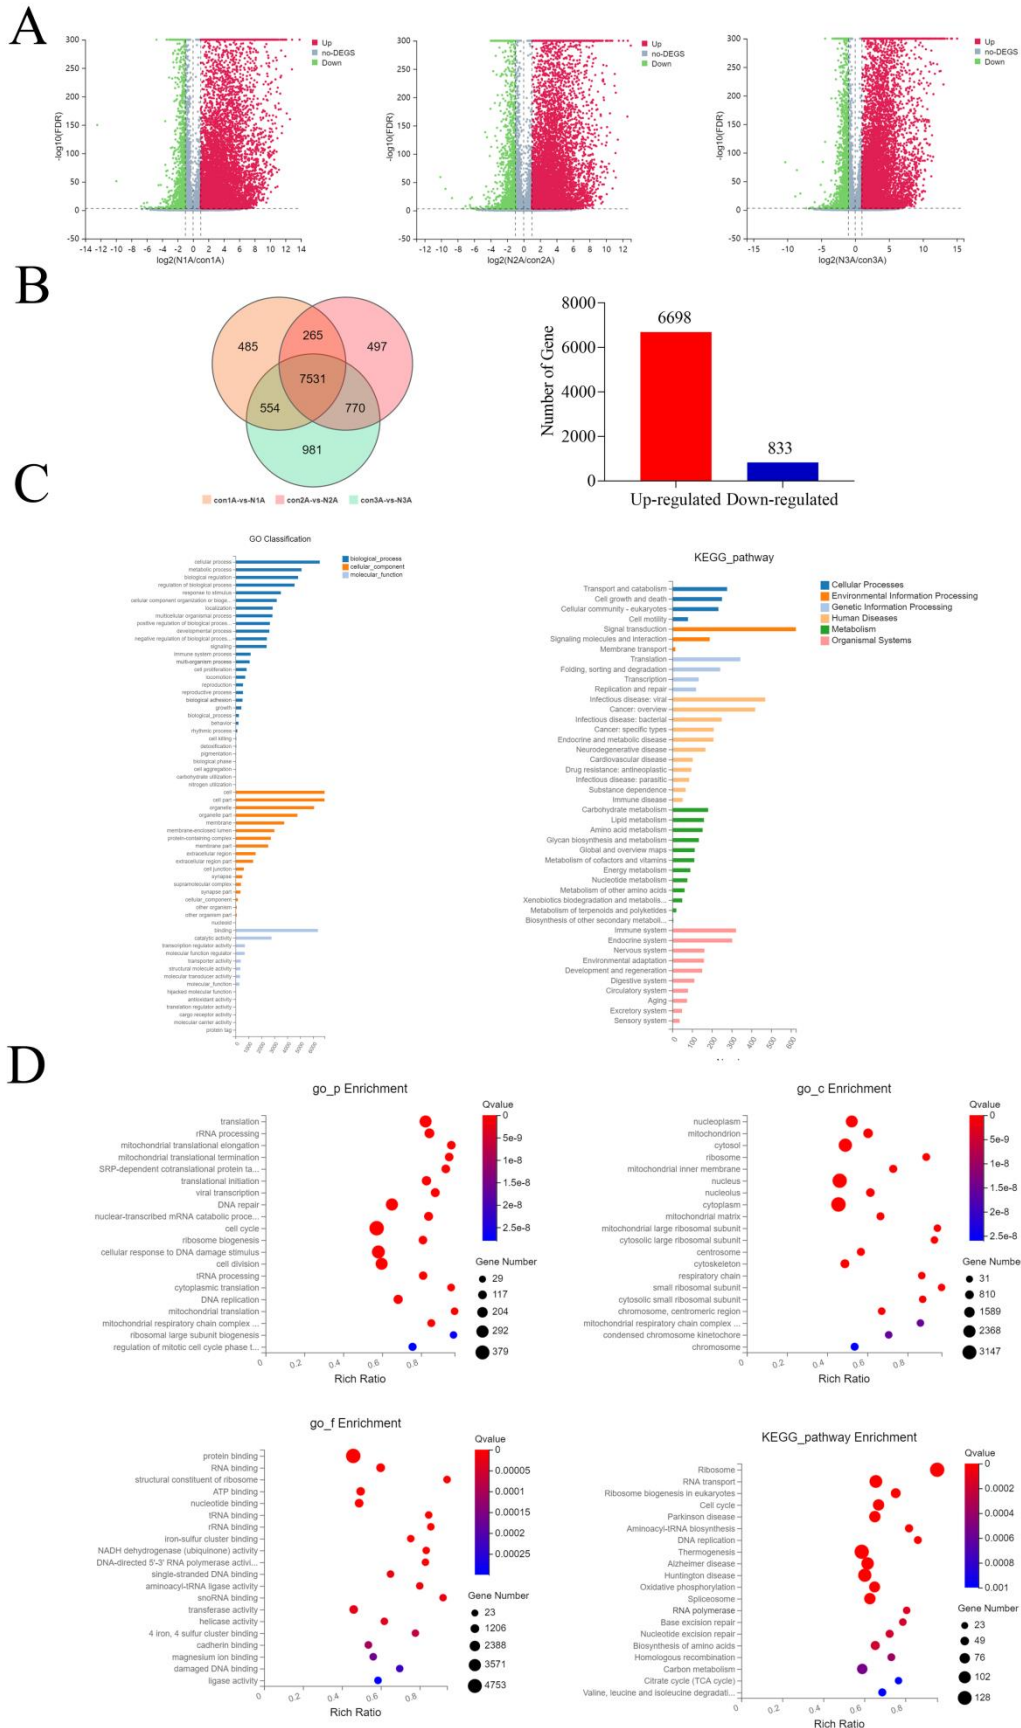

**Figure s2.** (A) Multiple genes were found to be differentially expressed in MKN45-educated neutrophils, including (7457, 7440, 7646) up-regulated genes and (1378, 1623, 2190) down-regulated genes in the three donors, respectively. (B) 7531 differential expressed genes (DEGs) overlapped in the three donors, including 6698 up-regulated genes and 833 down-regulated genes. (C, D) Gene Ontology (GO) analysis and KEGG pathway analysis.

Wang's Figure S3

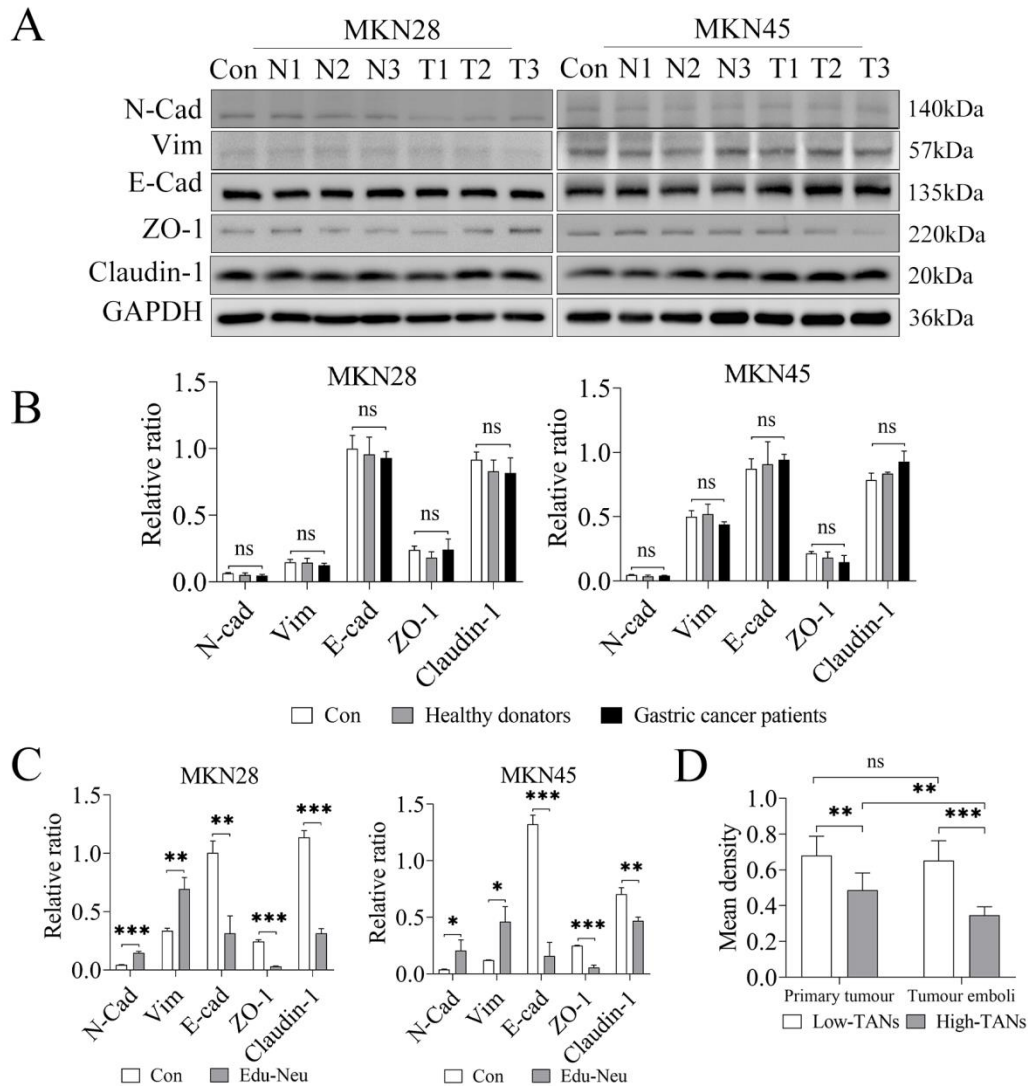

**Figure s3.** (A, B) CMs of isolated peripheral neutrophils from healthy donors (N1, N2 and N3) and gastric cancer patients (T1, T2 and T3) had no impact on the expression of proteins associated with EMT of MKN28 or MKN45 cells. (C) CMs of Edu-Neus decreased the expression of E-cad, ZO-1 and Claudin-1, while the expression of Vim and N-cad was increased. (D) E-cad expression in tumor tissues or lymphatic cancer emboli was decreased in high-TANs group compared with that in low-TNAs group, and E-cad levels in lymphatic cancer emboli were further decreased with regard to tumor tissues in high-TANs group. (\*,  $P<0.05$ ; \*\*,  $P<0.01$ ; \*\*\*,  $P<0.001$ ) (Edu-Neu, tumor-educated neutrophil)

Wang's Figure S4

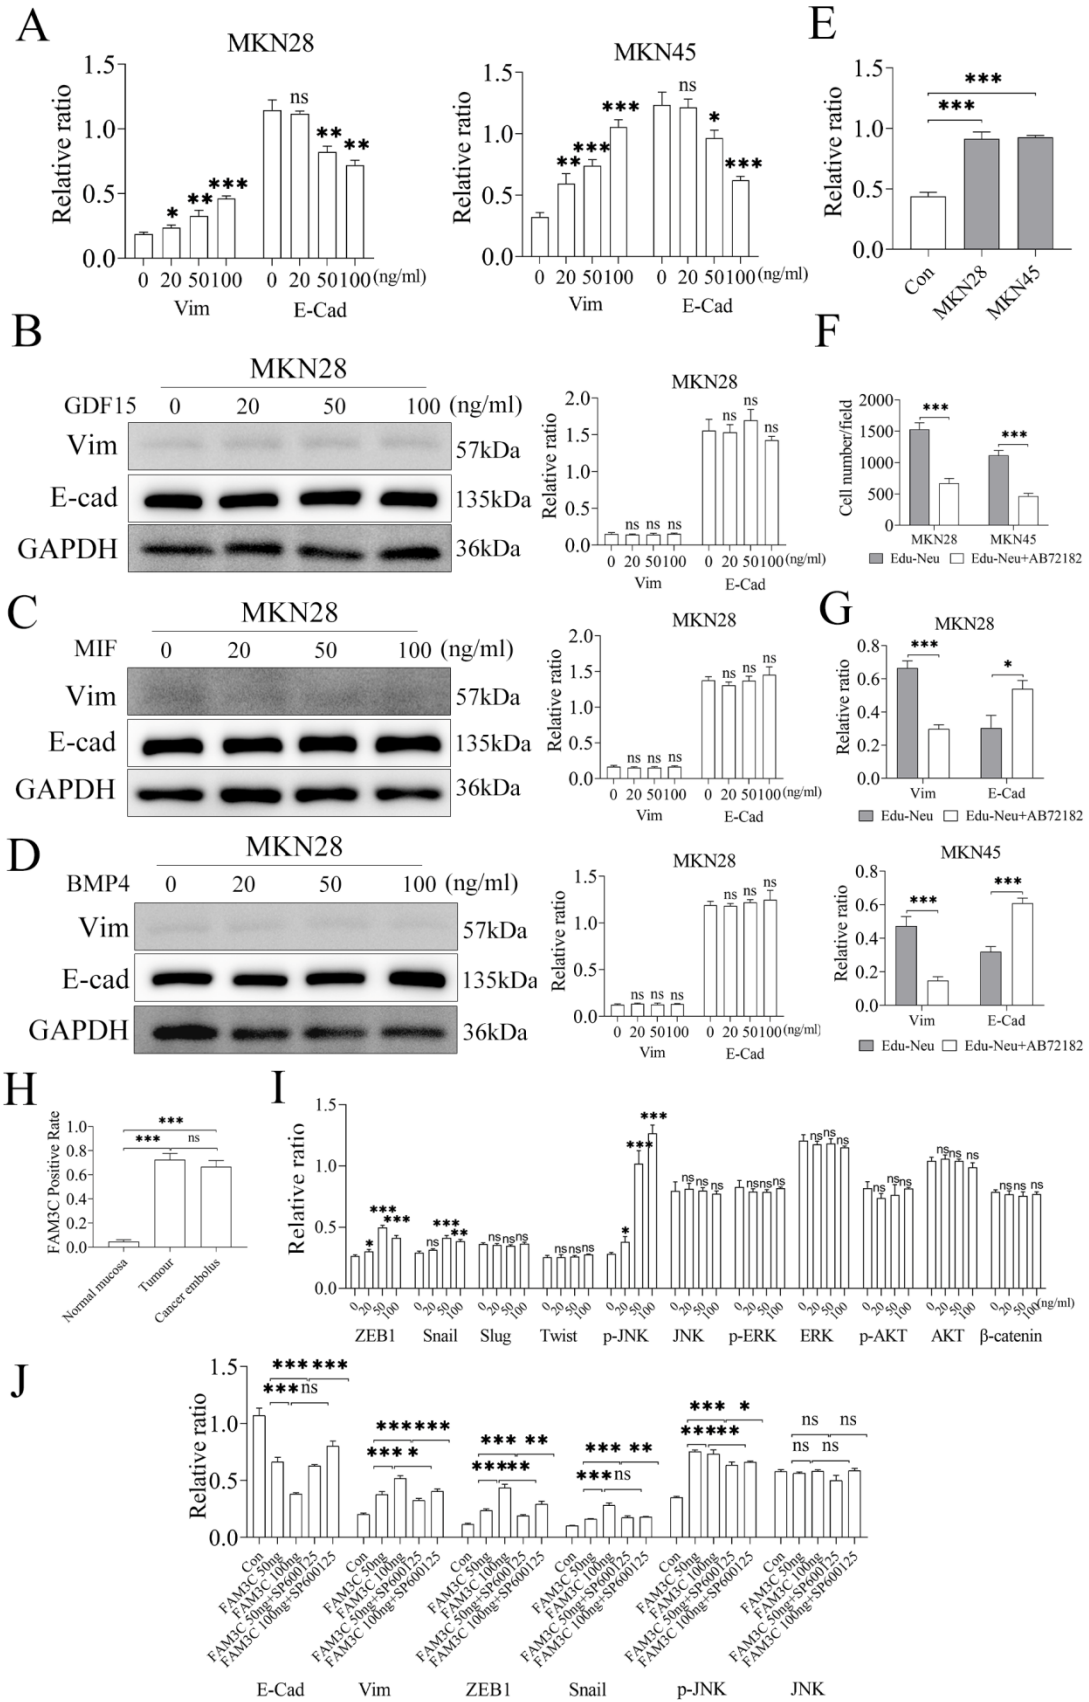

**Figure s4.** (A) FAM3C decreased E-cad expression and increased Vim expression of MKN45 and MKN28 cells in a dose-dependent manner. (B, C, D) GDF15 (B), MIF (C) and BMP4 (D) had no effects of E-cad and Vim expression. (E) Co-culture with MKN28 or MKN45 cells increased FAM3C levels in neutrophils. (F, G) Blockage of FAM3C with a neutralizing antibody reversed the enhanced-invasiveness (F) or induced-EMT (G) of tumor cells by Edu-Neus. (H) FAM3C positive rate were higher in TANs in human gastric tumor tissues and cancer emboli than that in normal stomach tissues by IHC assay. (I) FAM3C treatment up-regulated p-JNK as well as ZEB1 and Snail expression in MKN45 cells in a dose-dependent manner, but exerted no marked effects on expression of p-ERK, p-Akt, Slug and  $\beta$ -Catenin, and were reversed with JNK inhibitor treatment (J). (\*,  $P<0.05$ ; \*\*,  $P<0.01$ ; \*\*\*,  $P<0.001$ ) (Edu-Neu, tumor-educated neutrophil)

Wang's Figure S5

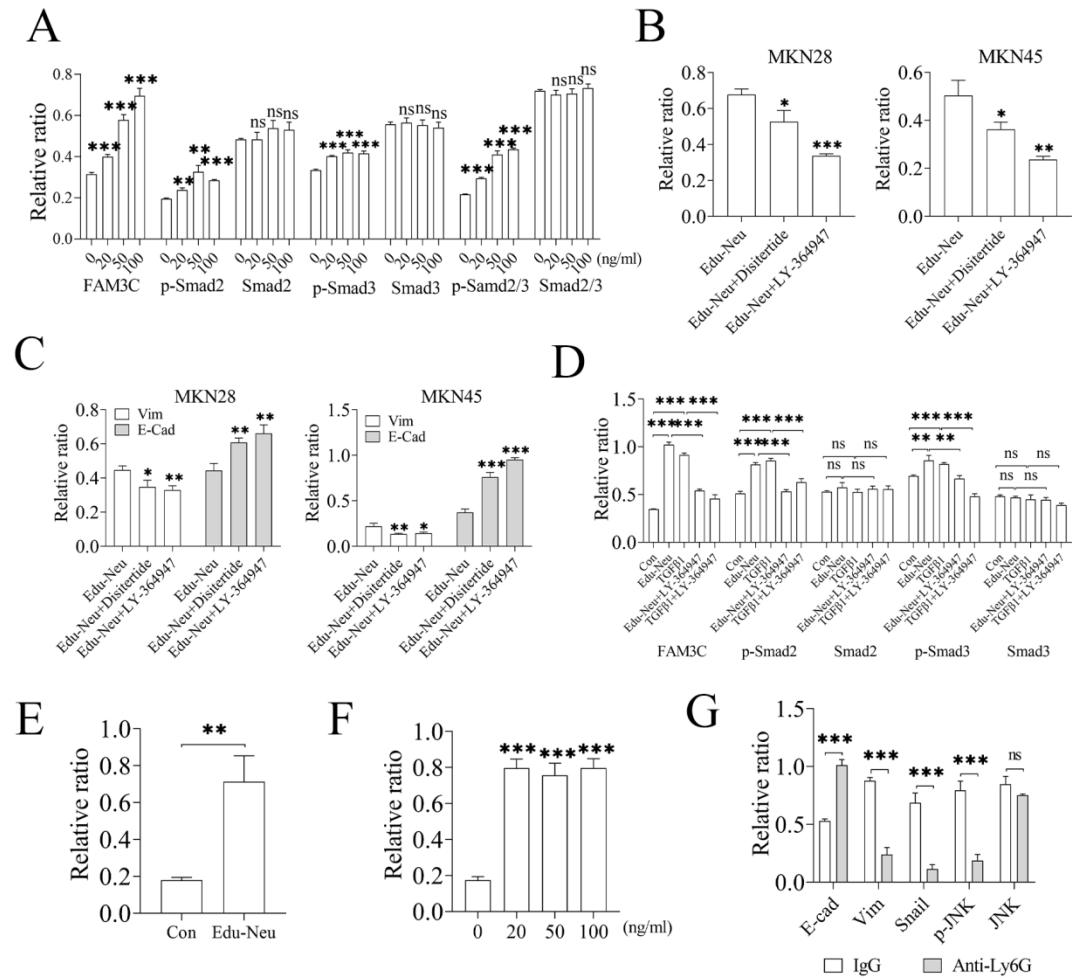

**Figure s5.** (A) TGFβ1 up-regulated FAM3C and p-Smad2, p-Smad3 or p-Smad2/3 expression in a dose-dependent manner. (B) Treatment with Disitertide or LY-364947 inhibited FAM3C expression. (C) Treatment with Disitertide or LY-364947 reversed the expression of EMT markers in tumor cells. (D) LY-364947 could down-regulate FAM3C and p-Smad2 or p-Smad3 expression in neutrophils. (E) Co-culture with neutrophils could increase CD151 expression. (F) FAM3C could increase CD151 expression in tumor cells. (G) E-cad level was increased whereas expressions of Vim, Snail and p-JNK were decreased significantly in anti-Ly6G-treated group with relative to IgG-treated group. (\*,  $P<0.05$ ; \*\*,  $P<0.01$ ; \*\*\*,  $P<0.001$ ) (Edu-Neu, tumor-educated neutrophil)

## Supplementary Table 1

**Table s1A. Clinicopathologic features associated with LNM in T1b gastric cancer.**

| Clinicopathologic Features    |              | LNM        |             | $\chi^2$ | <i>P</i> |
|-------------------------------|--------------|------------|-------------|----------|----------|
|                               |              | presence   | absence     |          |          |
|                               |              | (n=61) (%) | (n=196) (%) |          |          |
| Gender                        | male         | 24 (32.4)  | 50 (67.6)   | 3.694    | 0.051    |
|                               | female       | 37 (20.2)  | 146 (79.8)  |          |          |
| Age (year)                    | <65          | 26 (19.1)  | 110 (80.9)  | 2.882    | 0.078    |
|                               | ≥65          | 35 (28.9)  | 86 (71.1)   |          |          |
| Tumor location in the stomach | upper third  | 12 (18.5)  | 53 (81.5)   | 4.432    | 0.107    |
|                               | middle third | 12 (17.9)  | 55 (82.1)   |          |          |
|                               | lower third  | 37 (29.6)  | 88 (70.4)   |          |          |
| Tumor diameter (cm)           | <2           | 18 (17.0)  | 88 (83.0)   | 4.803    | 0.090    |
|                               | 2-3          | 23 (27.4)  | 61 (72.6)   |          |          |
|                               | ≥3           | 20 (29.9)  | 47 (70.1)   |          |          |
| Macroscopic type              | elevated     | 8 (27.6)   | 21 (72.4)   | 1.011    | 0.620    |
|                               | flat         | 3 (15.0)   | 17 (85.0)   |          |          |
|                               | depressed    | 50 (24.0)  | 158 (76.0)  |          |          |
| Depth of invasion             | SM1          | 9 (13.0)   | 60 (87.0)   | 5.177    | 0.014    |
|                               | SM2          | 52 (27.7)  | 136 (72.3)  |          |          |
| Lauren classification         | intestinal   | 25 (15.3)  | 138 (84.7)  | 33.214   | 0.000    |
|                               | diffuse      | 4 (14.3)   | 24 (85.7)   |          |          |
|                               | mixed        | 28 (57.1)  | 21 (42.9)   |          |          |
|                               | not defined  | 4 (23.5)   | 13 (76.5)   |          |          |
| Histological classification   | well         | 2 (4.9)    | 39 (95.1)   | 18.700   | 0.000    |
|                               | moderately   | 27 (20.6)  | 104 (79.4)  |          |          |

|                            |          |           |            |        |       |
|----------------------------|----------|-----------|------------|--------|-------|
|                            | poorly   | 32 (37.6) | 53 (62.4)  |        |       |
| Lymphatic invasion         | absence  | 22 (11.5) | 169 (88.5) | 58.725 | 0.000 |
|                            | presence | 39 (59.1) | 27 (40.9)  |        |       |
| Perineural invasion        | absence  | 54 (22.4) | 187 (77.6) | 2.689  | 0.068 |
|                            | presence | 7 (43.8)  | 9 (56.3)   |        |       |
| <i>H. pylori</i> infection | absence  | 43 (23.1) | 143 (76.9) | 0.045  | 0.744 |
|                            | presence | 18 (25.4) | 53 (74.6)  |        |       |
| TANs                       | low      | 17 (12.4) | 120 (87.6) | 19.476 | 0.000 |
|                            | high     | 44 (36.7) | 76 (63.3)  |        |       |

**Table s1B. Multivariate analysis of risk factors for LNM in T1b gastric cancer.**

| Clinicopathologic Features  | Odds ratio | 95% confidence interval | <i>P</i> |
|-----------------------------|------------|-------------------------|----------|
| Depth of invasion           | 2.581      | 0.930-7.158             | 0.069    |
| Mixed Lauren classification | 8.676      | 1.906-39.492            | 0.007    |
| Poorly differentiation      | 4.040      | 0.631-25.849            | 0.140    |
| Lymphatic invasion          | 8.773      | 4.082-18.858            | 0.000    |
| Higher TANs                 | 3.519      | 1.606-7.710             | 0.002    |

**Table s1C. Clinicopathologic features associated with LNM in SM1 gastric cancer.**

| Clinicopathologic Features |        | LNM       |            | $\chi^2$ | <i>P</i> |
|----------------------------|--------|-----------|------------|----------|----------|
|                            |        | presence  | absence    |          |          |
|                            |        | (n=9) (%) | (n=60) (%) |          |          |
| Gender                     | male   | 4 (22.2)  | 14 (77.8)  | 0.880    | 0.226    |
|                            | female | 5 (9.8)   | 46 (90.2)  |          |          |
| Age (year)                 | <65    | 5 (12.8)  | 34 (87.2)  | 0.000    | 1.000    |
|                            | ≥65    | 4 (13.3)  | 26 (86.7)  |          |          |

|                               |              |          |            |        |       |
|-------------------------------|--------------|----------|------------|--------|-------|
| Tumor location in the stomach | upper third  | 0 (0.0)  | 16 (100.0) | 4.686  | 0.102 |
|                               | middle third | 2 (9.1)  | 20 (90.9)  |        |       |
|                               | lower third  | 7 (22.6) | 24 (77.4)  |        |       |
| Tumor diameter (cm)           | <2           | 4 (12.9) | 27 (87.1)  | 1.347  | 0.531 |
|                               | 2-2.9        | 4 (19.0) | 17 (81.0)  |        |       |
|                               | ≥3           | 1 (5.9)  | 16 (94.1)  |        |       |
| Macroscopic type              | elevated     | 1 (10.0) | 9 (90.0)   | 0.970  | 0.722 |
|                               | flat         | 0 (0.0)  | 8 (100.0)  |        |       |
|                               | depressed    | 8 (15.7) | 43 (84.3)  |        |       |
| Lauren classification         | intestinal   | 2 (4.2)  | 46 (95.8)  | 16.675 | 0.000 |
|                               | diffuse      | 0 (0.0)  | 5 (100.0)  |        |       |
|                               | mixed        | 7 (53.8) | 6 (46.2)   |        |       |
|                               | not defined  | 0 (0.0)  | 3 (100.0)  |        |       |
| Histological classification   | well         | 0 (0.0)  | 17 (100.0) | 11.787 | 0.001 |
|                               | moderately   | 2 (5.9)  | 32 (94.1)  |        |       |
|                               | poorly       | 7 (38.9) | 11 (61.1)  |        |       |
| Lymphatic invasion            | absence      | 4 (6.7)  | 56 (93.3)  | 12.463 | 0.001 |
|                               | presence     | 5 (55.6) | 4 (44.4)   |        |       |
| Perineural invasion           | absence      | 9 (13.2) | 59 (86.8)  | 0.000  | 1.000 |
|                               | presence     | 0 (0.0)  | 1 (100.0)  |        |       |
| <i>H. pylori</i> infection    | absence      | 8 (17.0) | 39 (83.0)  | 1.104  | 0.254 |
|                               | presence     | 1 (4.5)  | 21 (95.5)  |        |       |
| TANs                          | low          | 1 (2.6)  | 37 (97.4)  | 6.170  | 0.009 |
|                               | high         | 8 (25.8) | 23 (74.2)  |        |       |

**Table s1D. Multivariate analysis of potential risk factors for LNM in the patients with SM1 gastric cancer.**

| Clinicopathologic Features | Odds ratio | 95% confidence interval | <i>P</i> |
|----------------------------|------------|-------------------------|----------|
|----------------------------|------------|-------------------------|----------|

|                    |        |               |       |
|--------------------|--------|---------------|-------|
| Lymphatic invasion | 11.895 | 0.791-178.891 | 0.073 |
| TANs               | 5.763  | 0.382-86.933  | 0.206 |

**Table s1E. Clinicopathologic features associated with LNM in SM2 gastric cancer.**

| Clinicopathologic Features    |              | LNM        |             | $\chi^2$ | <i>P</i> |
|-------------------------------|--------------|------------|-------------|----------|----------|
|                               |              | presence   | absence     |          |          |
|                               |              | (n=52) (%) | (n=136) (%) |          |          |
| Gender                        | male         | 20 (35.7)  | 36 (64.3)   | 2.045    | 0.113    |
|                               | female       | 32 (24.2)  | 100 (75.8)  |          |          |
| Age (year)                    | <65          | 21 (21.6)  | 76 (78.4)   | 3.024    | 0.073    |
|                               | ≥65          | 31 (34.1)  | 60 (65.9)   |          |          |
| Tumor location in the stomach | upper third  | 12 (24.5)  | 37 (75.5)   | 1.667    | 0.468    |
|                               | middle third | 10 (22.2)  | 35 (77.8)   |          |          |
|                               | lower third  | 30 (31.9)  | 64 (68.1)   |          |          |
| Tumor diameter (cm)           | <2           | 14 (18.7)  | 61 (81.3)   | 5.952    | 0.049    |
|                               | 2-3          | 19 (30.2)  | 44 (69.8)   |          |          |
|                               | ≥3           | 19 (38.0)  | 31 (62.0)   |          |          |
| Macroscopic type              | elevated     | 7 (36.8)   | 12 (63.2)   | 1.019    | 0.636    |
|                               | flat         | 3 (25.0)   | 9 (75.0)    |          |          |
|                               | depressed    | 42 (26.8)  | 115 (73.2)  |          |          |
| Lauren classification         | intestinal   | 23 (20.0)  | 92 (80.0)   | 19.498   | 0.000    |
|                               | diffuse      | 4 (17.4)   | 19 (82.6)   |          |          |
|                               | mixed        | 21 (58.3)  | 15 (41.7)   |          |          |
|                               | not defined  | 4 (28.6)   | 10 (71.4)   |          |          |
| Histological classification   | well         | 2 (8.3)    | 22 (91.7)   | 7.975    | 0.017    |
|                               | moderately   | 25 (25.8)  | 72 (74.2)   |          |          |
|                               | poorly       | 25 (37.3)  | 42 (62.7)   |          |          |

|                            |          |           |            |        |       |
|----------------------------|----------|-----------|------------|--------|-------|
| Lymphatic invasion         | absence  | 18 (13.7) | 113 (86.3) | 39.573 | 0.000 |
|                            | presence | 34 (59.6) | 23 (40.4)  |        |       |
| Perineural invasion        | absence  | 45 (26.0) | 128 (74.0) | 2.001  | 0.128 |
|                            | presence | 7 (46.7)  | 8 (53.3)   |        |       |
| <i>H. pylori</i> infection | absence  | 35 (25.2) | 104 (74.8) | 1.198  | 0.265 |
|                            | presence | 17 (34.7) | 32 (65.3)  |        |       |
| TANs                       | low      | 16 (16.2) | 83 (83.8)  | 12.630 | 0.000 |
|                            | high     | 36 (40.4) | 53(59.6)   |        |       |

**Table s1F. Multivariate analysis of potential risk factors for LNM in the patients with SM2 gastric cancer.**

| Clinicopathologic Features  | Odds ratio | 95% confidence interval | <i>P</i> |
|-----------------------------|------------|-------------------------|----------|
| Tumor size $\geq$ 3cm       | 2.270      | 0.805-6.404             | 0.121    |
| Mixed Lauren classification | 6.506      | 1.259-33.614            | 0.025    |
| Poorly differentiation      | 3.134      | 0.465-21.108            | 0.240    |
| Lymphatic invasion          | 7.421      | 3.260-16.894            | 0.000    |
| TANs                        | 3.518      | 1.522-8.129             | 0.003    |

## Supplementary Table 2

**Table s2A. Multivariate analysis of potential risk factors for lymphatic invasion in patients with T1b gastric cancer.**

| Clinicopathologic Features    | Odds ratio | 95% confidence interval | <i>P</i> |
|-------------------------------|------------|-------------------------|----------|
| Age                           | 1.956      | 0.991-3.860             | 0.053    |
| Tumor location in the stomach | 3.119      | 1.290-7.543             | 0.012    |
| Tumor size                    | 3.849      | 1.672-8.860             | 0.002    |
| Depth of invasion             | 2.979      | 1.255-7.069             | 0.013    |
| Lauren classification         | 3.901      | 0.823-18.481            | 0.086    |
| Histological classification   | 7.464      | 1.386-40.210            | 0.019    |
| TANs                          | 2.467      | 1.279-4.756             | 0.007    |

**Table s2B. Multivariate analysis of potential risk factors for lymphatic invasion in the patients with SM1 gastric cancer.**

| Clinicopathologic Features  | Odds ratio | 95% confidence interval | <i>P</i> |
|-----------------------------|------------|-------------------------|----------|
| Tumor diameter              | 8.512      | 0.587-123.510           | 0.117    |
| Histological classification | 2.352      | 0.364-15.221            | 0.369    |
| TANs                        | 15.856     | 1.536-163.661           | 0.020    |

**Table s2C. Multivariate analysis of potential risk factors for lymphatic invasion in the patients with SM2 gastric cancer.**

| Clinicopathologic Features  | Odds ratio | 95% confidence interval | <i>P</i> |
|-----------------------------|------------|-------------------------|----------|
| Tumor size                  | 3.515      | 1.533-8.056             | 0.003    |
| Histological classification | 5.054      | 1.044-24.462            | 0.044    |
| TANs                        | 2.243      | 1.148-4.382             | 0.018    |

**Table s2D. Neutrophils in lymphatic cancer emboli were associated with LNM in the T1b or SM2 gastric cancer.**

| Clinicopathologic Features |          | LNM of T1b tumors |            | $\chi^2$ | <i>P</i> | LNM of SM2 tumors |            | $\chi^2$ | <i>P</i> |
|----------------------------|----------|-------------------|------------|----------|----------|-------------------|------------|----------|----------|
|                            |          | presence          | absence    |          |          | presence          | absence    |          |          |
|                            |          | (n=39) (%)        | (n=27) (%) |          |          | (n=34) (%)        | (n=23) (%) |          |          |
| Neutrophils                | Absence  | 15 (42.86)        | 20 (57.14) | 6.757    | 0.006    | 13 (41.94)        | 18 (58.06) | 7.320    | 0.003    |
| in lymphatic               | Presence | 24 (77.42)        | 7 (22.58)  |          |          | 21 (80.77)        | 5 (19.23)  |          |          |
| cancer                     | —Less    | 16 (84.21)        | 3 (15.79)  | 0.486    | 0.384    | 15 (88.24)        | 2 (11.76)  | 0.647    | 0.302    |
| embolus                    | —More    | 8 (66.67)         | 4 (33.33)  |          |          | 6 (66.67)         | 3 (33.33)  |          |          |

**Table s2E. Correlation of TANs abundance in tumors with neutrophils in lymphatic cancer emboli in T1b or SM2 gastric cancer.**

|                                                       |          | TANs       |           | $\chi^2$ | <i>r</i> | <i>P</i> |
|-------------------------------------------------------|----------|------------|-----------|----------|----------|----------|
|                                                       |          | Low        | High      |          |          |          |
| lymphatic invasion of T1b                             | Absence  | 114 (59.7) | 77 (40.3) | 11.179   | 0.217    | 0.001    |
|                                                       | Presence | 23 (34.8)  | 43 (65.2) |          |          |          |
| lymphatic invasion of SM2                             | Absence  | 77 (58.8)  | 54 (41.2) | 5.705    | 0.186    | 0.012    |
|                                                       | Presence | 22 (38.6)  | 35 (61.4) |          |          |          |
| neutrophils in lymphatic cancer embolus of T1b tumors | Absence  | 19 (54.3)  | 16 (45.7) | 10.644   | 0.433    | 0.001    |
|                                                       | Presence | 4 (12.9)   | 27 (87.1) |          |          |          |
| neutrophils in lymphatic cancer embolus of SM2 tumors | Absence  | 18 (58.1)  | 13 (41.9) | 9.142    | 0.437    | 0.001    |
|                                                       | Presence | 4 (15.4)   | 22 (84.6) |          |          |          |

**Table s3. Gene alterations associated with N1 or N2 phenotype in Edu-Neus**

| N1 (tumor-suppressive) |                     |          | N2 (tumor-promoting) |                     |          |
|------------------------|---------------------|----------|----------------------|---------------------|----------|
| Gene                   | log2 (Edu-Neus/Con) | <i>P</i> | Gene                 | log2 (Edu-Neus/Con) | <i>P</i> |
| FAS                    | -1.554              | 0.000    | Adenosine            | undetected          |          |
| Granzyme B             | undetected          |          | Arginase 1           | undetected          |          |
| INF- $\beta$           | undetected          |          | BV8                  | undetected          |          |
| INF- $\gamma$          | undetected          |          | CCL17                | undetected          |          |
| LPS                    | undetected          |          | CCL2                 | -3.764              | 0.000    |
| MET                    | 9.436               | 0.000    | Elastase             | undetected          |          |
|                        |                     |          | G-CSF                | undetected          |          |
|                        |                     |          | Hydrogen peroxide    | undetected          |          |
|                        |                     |          | ICAM1                | undetected          |          |
|                        |                     |          | IL10                 | -1.503              | 0.000    |
|                        |                     |          | IL17D'               | 3.391               | 0.000    |
|                        |                     |          | IL-1 $\beta$         | undetected          |          |
|                        |                     |          | IL8                  | undetected          |          |
|                        |                     |          | L-lactate            | undetected          |          |
|                        |                     |          | LOX-1                | undetected          |          |
|                        |                     |          | MMP9                 | undetected          |          |
|                        |                     |          | MPO                  | undetected          |          |
|                        |                     |          | mPR3                 | undetected          |          |
|                        |                     |          | NAMPT                | undetected          |          |
|                        |                     |          | NETs/PAD4            | undetected          |          |
|                        |                     |          | Oncostatin M         | 2.476               | 0.000    |
|                        |                     |          | PDGFB                | 4.370               | 0.000    |
|                        |                     |          | PGE2                 | undetected          |          |
|                        |                     |          | ROS                  | undetected          |          |

---

|           |            |       |
|-----------|------------|-------|
| S100A8/9  | -1.088     | 0.000 |
| STAT/IRF8 | undetected |       |
| STAT3     | undetected |       |
| TGFB3     | 4.099      | 0.000 |
| TGFBRAP1  | 2.335      | 0.000 |
| TNF-a     | undetected |       |
| TRAIL     | undetected |       |
| VEGFB     | 2.151      | 0.000 |

---
